# Supplementary material for: Examining Usability of RxFill: Integrating Health IT to Support Medication Adherence
Source: Research Square preprint supplement (doi:10.21203/rs.3.rs-5485583/v1), 2025-08-18
Supplement: Supplementary file 1 [file 0f1c8e2988bc740d67b4167f.docx]

**Appendix 2: Aim 1 Codebook**

| Name | Description |
| --- | --- |
| 01. General Clinical Practice | **Parent code heading.** Codes pertain to **general** clinical practice. Codes do not pertain to adherence- or RxFill-specific issues. |
| a. Anticipation of Patient Issues | Practitioners’ processes, actions, or considerations before an encounter to anticipate or orient themselves to patient clinical issues |
| Mechanism to Anticipate Issues | Uses mechanisms, tools, or functionalities to anticipate patient issues before the encounter |
| b. Care Dependent on Patient Variables | General care (provided or planned) differs according to patient characteristics. |
| Complex Patients Require More Care Time | “Complex” patients require more time to complete general care practices, such as anticipating patient issues or work-up. “Complex” patients may be those with multiple disease states, health conditions, or medications. |
| c. Comfort Using the EHR Generally | General comfort with the EHR and using it to complete work |
| d. Use of the Take Action Tab in the EHR | General use of the “Take Action Tab” in the EHR.  *(The Take Action Tab is where RxFill functionality is housed; potential link between RxFill usability [or lack thereof] and use of the Take Action Tab in general)* |
| e. Use of the Medication Tab in the EHR | General use of the “Medication Tab” in the EHR |
| 02. Adherence Specific Issues | **Parent code heading.** Codes pertain to **medication adherence specific issues** in practice. Codes do not pertain to general clinical practice or specific mention of RxFill. |
| a. Dependent on Patient Variables | Care regarding medication adherence (that is provided or planned) differs according to patient characteristics. |
| b. Reliability of Patients | For sources of medication adherence information, issues relating to patient reliability are mentioned |
| c. Sources of Medication Adherence Information | Uses other (non-patient) sources of medication adherence information in their clinical practice. |
| Reliability of Other Sources of Medication Adherence Information | For sources of medication adherence information, issues relating to reliability of other (non-patient) sources are mentioned |
| d. Engages Patient Around Adherence | Engages patients in conversations around medication adherence or adherence issues. |
| Use of Tool to Engage Patients Around Adherence | Mechanism or use of a tool to engage patients around adherence. |
| e. Tries to Contextualize Non-Adherence | Attempts to explain or contextualize patient non-adherence.  *(Potential link between trying to explain non-adherence and effectiveness/ability to engage patients around adherence)* |
| 03. RxFill | **Parent code heading.** Codes pertain to **RxFill** (and anticipated use). Codes do not pertain to general clinical practice or general adherence issues. |
| a. Previously Did Not USE RxFill | Previously did not use RxFill in clinical practice prior to the interview. |
| Previously AWARE of RxFill | Previously aware of RxFill prior to interview, but still did not use. |
| Previously UNAWARE of RxFill | Previously unaware of RxFill prior to interview and did not use. |
| b. Sees the Value in RxFill | RxFill can add value to clinical practice. |
| Reduces Workload | RxFill can reduce workload, including for members of clinical team. |
| Use RxFill to Engage Patients Around Adherence | RxFill can be used to as a mechanism/tool to engage patients around medication adherence issues. |
| c. Anticipated Situations for Using RxFill | Anticipates using RxFill in clinical practice. |
| Dependent on Patient Variables | Anticipated use of RxFill differs according to patient characteristics. |
| d. Anticipated Challenges & Barriers to Using RxFill | Anticipates challenges to actual RxFill use in clinical practice. |
| Reliability of RxFill | For sources of medication adherence information, issues relating to reliability of RxFill are mentioned. |
| Tries to Contextualize Non-Adherence False-Positives and Unknowns | Attempt to explain or contextualize RxFill as a false-positive alert for non-adherence. Participant describes how RxFill dates are correct/reliable but doesn't mean patient is non-adherent.  *(Similar to code 2e, in that participant is trying to “justify” or “contextualize” non-adherence; however, this code specifically highlights the limitations of RxFill in that it’s only showing part of the story and may not be a true positive flag for non-adherence)* |
| e. Recommendations to Improve RxFill | Ideas for improving RxFill functionality, use, or ease of use. |
