# Supplementary material for: Examining Usability of RxFill: Integrating Health IT to Support Medication Adherence
Source: Research Square preprint supplement (doi:10.21203/rs.3.rs-5485583/v1), 2025-08-18
Supplement: Supplementary file 2 [file a857f7292c164af4859fe984.docx]

**Appendix 1: Aim 1 Interview Guide**

## **RxFill: An Innovative Approach to Support Medication Adherence**

**Semi-Structured Cognitive Interview Guide**

*Prior to the Interview Checklist:*

- *Go Pro*
- *Live Scribe Pen*
- *Interview Guide*
- *Computer with Case PowerPoint*
- *Demographic Survey*
- *SUS Survey*

| 1. Thank you for agreeing to participate in this session. Your experience and opinions are very important to us. The cases and our interview are being recorded so that we can fully capture your thoughts on this topic but what you say is confidential, and your name or the name of your organizations will not be used in reporting findings of the study. We may include respondent comments in reports and publications but will not attribute the comments to specific individuals or organizations. We’ll also be recording the computer screen to capture your actions, but your face will not be included in the video.   Throughout the interview, feel free to share examples from real colleagues or patients but try not to include identifiable or sensitive information such as names or birthdates.  Your participation in this study is voluntary. If at any time you do not feel comfortable answering a question, or do not know the answer, please let us know and we will move on. The interview is estimated to take 45 minutes. Thank you for giving us this time.   What questions do you have before we begin? |
| --- |
| 1. We’re interested in finding out how primary care prescribers acquire and use patient medication adherence information, especially information from patients and the electronic health record. When I say “adherence” I’m talking about how accurately patient’s take their medications compared to prescribed directions or advice. |
| 1. The purpose of this session is to walk through a new feature that UW Health rolled out in June, called RxFill which theoretically incorporates outpatient, community pharmacy prescription fill and refill data into the EHR for you to use during encounters. What we’re hoping to do today is to walk through a few simulated cases to see how you might use RxFill in practice. |
| 1. I’m going to provide you with instructions to “navigate” to a page or a screen and complete the cases. While you’re following the instructions, I’ll ask that you try to “think aloud.” For example, if I ask you to find the patient medication information, I’ll ask you to tell me how you know it’s the medication information, what tab you’re clicking on, why, or what you were expecting to find. It can be totally stream of consciousness, we’re just trying to figure out what someone might be thinking when they use this information in real practice. I’ll also be asking some questions throughout the cases. There will be 4, fairly short scenarios, and then some final questions afterwards. Do you have any other questions before we begin? |
| 1. In these scenarios, you’re going to be preparing for a routine annual visit with a patient. I know these are simulated scenarios, but what is your typical routine before seeing patients for annual appointments?   Probe: Do you work-up patients before you see them? How long does this process take?  Probe: Does this vary based on type of patient? Complexity? Familiarity? Type of appointment?  Probe: What are you looking for when you review the patient’s chart?  Probe: What information are you hoping to get?  Probe: How do you incorporate that in your appointment?  Probe: Are there certain patients that you might be interested in patient adherence information to inform your encounters?  Probe: Specifically, if you were looking for information on the patient’s medication adherence, what would you be looking for? |
| 1. In our scenario you preparing for a routine annual visit with our patient Nadir Tennessee..   As a reminder, while you complete these steps, please walk me through what you’re doing or your stream of consciousness.   So go ahead to our simulated EHR. We have already “logged in” for you and it’s ready to search. |
| 1. So first, click on our highlighted patient, Nadir Tennessee. Date of Birth June 22, 1974. |
| 1. Alright, we’ve opened to the Take Action tab of the EHR. Next, on the left most window, scroll down to view the entire Medication Management section. |
| 1. So let’s take a look at this patient’s Medication orders. They’re currently on 6 medications. 5 that were prescribed by clinic providers, and one patient reported medication.   Click on the medication titled “**atorvastatin**” or brand LIPITOR 20 mg tab. Remember you’re prepping for their annual appointment. What do you see when you look at the information for **atorvastatin**?  PROBE: Start Date, “Ord/Sold” Date, Pharmacy |
| 1. Next, click on the “Report” link under within the **atorvastatin** medication information. The order report has opened in a new tab. What do you see when you look at this report?  Probe: How is the patient using their **atorvastatin**? How would you describe the patient’s adherence with their **atorvastatin**?  Probe: [If don’t notice Dispense History] Go ahead and look at the “Dispense History” from the External Pharmacies. What do you notice?  Probe: You mentioned that the patient is [ADHERENT/NON-ADHERENT] can you tell me more about how you came to that conclusion?  Probe: The EHR provided you with the date of **atorvastatin’s** last fill, how did you use this information?  NOTE: adherent, filling perfectly every 30 days  only “scroll” once or will go to lisinopril |
| 1. So, for the purpose of this scenario, now you have this information, how might you use this in your encounter with the patient? |
| 1. How do you normally engage patients in conversations about their medication adherence?  Probe: How reliable are patients in reporting their adherence? |
| 1. So we walked through this medication. Do you use this functionality in the EHR in the course of your typical encounters with patients?  Probe: Why or why not?  Probe: Where do you normally get information on the patient’s medications and adherence? |
| 1. Alright, let’s continue. Click on the “X” in the upper right-hand corner to close the **atorvastatin** report. Let’s take a look at another medication, the **albuterol** HFA inhaler. Go ahead and click on the medication name.  What do you see when you look at the information for the **albuterol** inhaler? |
| 1. Thank you. So once again, click on the “Report” link under the medication. What do you see when you look at this report?  Probe: How is the patient using their **albuterol** inhaler? How would you describe the patient’s adherence with their **albuterol** inhaler?  Probe: You mentioned that the patient is [ADHERENT/NON-ADHERENT] can you tell me more about how you came to that conclusion?  Probe: The EHR provided you with the date of **albuterol** last fill, how did you use this information?  NOTE: frequent fills; might be a red flag for poor asthma control  directions: 2 puffs every 4 to 6 hours as needed  1 fill = 16 day supply (200 doses / inhaler) |
| 1. So, for the purpose of this scenario, now you have this information, how might you use this in your encounter with the patient? |
| 1. Alright, let’s continue. Click on the “X” in the upper right-hand corner to close the **albuterol** report. Let’s take a look at a third medication, the **lisinopril**. Go ahead and click on the medication name.  What do you see when you look at the information for the **lisinopril**? |
| 1. Thank you. So once again, click on the “Report” link under the medication. What do you see when you look at this report?  Probe: How is the patient using their **lisinopril**? How would you describe the patient’s adherence with their **lisinopril**?  Probe: You mentioned that the patient is [ADHERENT/NON-ADHERENT] can you tell me more about how you came to that conclusion?  Probe: The EHR provided you with the date of **lisinopril** last fill, how did you use this information?  NOTE: filled perfectly until July (7/27) then stopped |
| 1. So, for the purpose of this scenario, now you have this information, how might you use this in your encounter with the patient? |
| 1. Alright, we’re going to take a look at one final medication. Go ahead and close this report by clicking the “X” in the top right corner. Finally, click on the medication “**metformin**.” What do you see when you look at the information for the **metformin**? |
| 1. And one more time, click on the “Report” link under the **metformin**. What do you see when you look at this report?  Probe: How is the patient using their **metformin**? How would you describe the patient’s adherence with their **metformin**?  Probe: You mentioned that the patient is [ADHERENT/NON-ADHERENT] can you tell me more about how you came to that conclusion?  Probe: The EHR provided you with the date of **metformin** last fill, how did you use this information?  NOTE: moderate adherence, filling 90 day supply every 100 to 110 days |
| 1. So for the purpose of this scenario, now you have this information, how might you use this in your appointment with the patient? |
| 1. Thank you! So that was the last of the scenario. So the next few questions are more general but we can refer to the EHR if we need to. |
| 1. So, you might have noticed I was guiding you towards looking at this RxFill information. How useful was this RxFill information in informing your plans for the encounters?  Probe: How useful would it be for your typical practice?   Probe: When could you see yourself seeing RxFill? When working up patients? During patient visits? |
| 1. What additional information would have been helpful to have regarding the patient’s medication use or even adherence when preparing for this encounter? |
| 1. Let’s talk about the location of the information. Is this information where you expected it to be? Would you expect it to be somewhere else? |
| 1. Prior to today, did you know that this information was available in the EHR?  Probe: Do you find that you refer to that information?  Probe: Why or Why Not? |
| 1. How easy do you think it would be to find and use this information in your typical practice?   Probe: How would this fit in considering workload, patient schedules, etc. |
| 1. We talked a little bit about patients reporting their own adherence. Is there anywhere else or any other resource you might go to receive adherence information for patients, for any medication… not just those we mentioned today?  Probe: Do you find that you or members of your clinic team ever need to contact the pharmacy to obtain patient fill dates or adherence?  Probe: Do you ever receive faxes from patients’ insurance regarding adherence? How useful are those messages?  Probe: Do you ever find that you need to refer to external resources, like the PDMP or the patient’s insurance to obtain fill dates or adherence? |
| 1. So, we talked a little bit about RxFill and its location within the EHR, in general, how comfortable are you with the EHR or the use of functionalities within the EHR? |
| 1. That was the last official question I had, but do you have any thoughts or comments related to the idea of medication adherence or your experience with RxFill you’d like to share? |
| 1. Thank you so very much for your time! |
